# Supplementary material
Source: Springer Nature journal article supplement (https://www.springermedizin.de/resource/supplementary/13256_2009_1242_MOESM2_ESM.pdf/9647318)

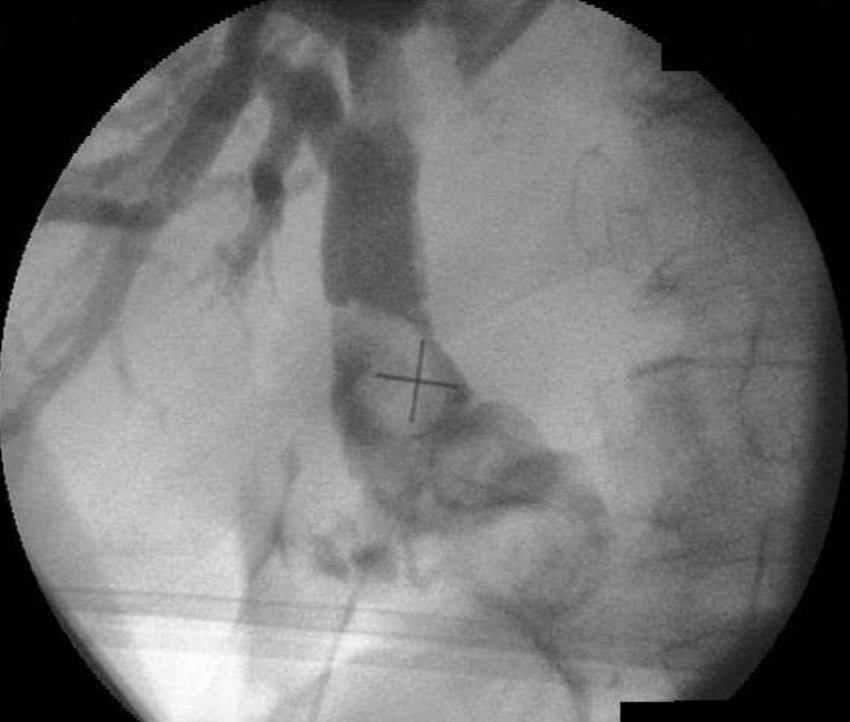

Supplement: MOESM2 [file 9647318]
